# Supplementary material for: Au–Ni synergy for enhanced electrochemical oxidation of ethanol over Au/Ni foam electrode
Source: Royal Society of Chemistry journal article supplement (doi:10.1039/d4cy01490a), 2025-01-01
Supplement: d4cy01490a1.pdf [file d4cy01490a1.pdf]

## **Au-Ni synergy for enhanced electrochemical oxidation of ethanol over Au/Ni foam electrode**

Xing Tan,<sup>a</sup> Ruixing Du,<sup>a</sup> Qitong Zhong,<sup>a</sup> Longfei Liao,<sup>b</sup> Huanhao Chen,<sup>a</sup> Zhenchen Tang,<sup>a</sup> Dafeng Yan,<sup>c</sup> Shiming Chen,<sup>d</sup> Feng Zeng<sup>a,\*</sup>

<sup>a</sup> State Key Laboratory of Materials-Oriented Chemical Engineering, College of Chemical Engineering, Nanjing Tech University, Nanjing 211816, Jiangsu, China

<sup>b</sup> School of Materials Science and Engineering, Harbin Institute of Technology (Shenzhen), Shenzhen 518055, Guangdong, China

<sup>c</sup> College of Chemistry and Chemical Engineering, Hubei University, Wuhan 430062, China

<sup>d</sup> School of Intelligent Medicine, China Medical University, Shenyang 110122, Liaoning, China

\* Email: zeng@njtech.edu.cn

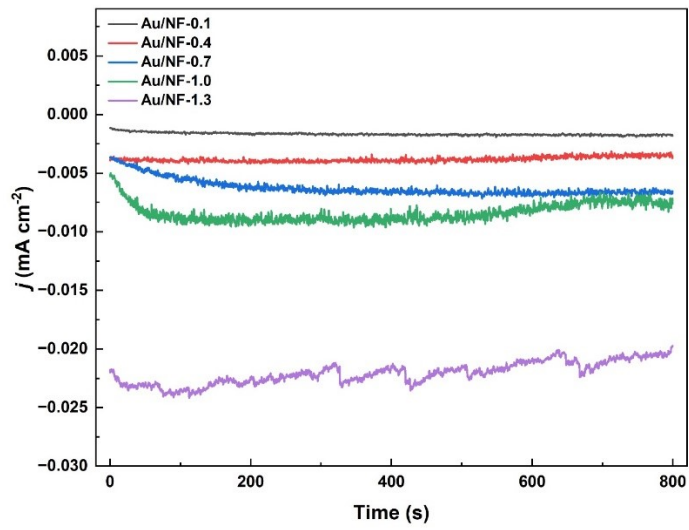

Figure S1. Electrodeposition current of Au/NF electrodes.

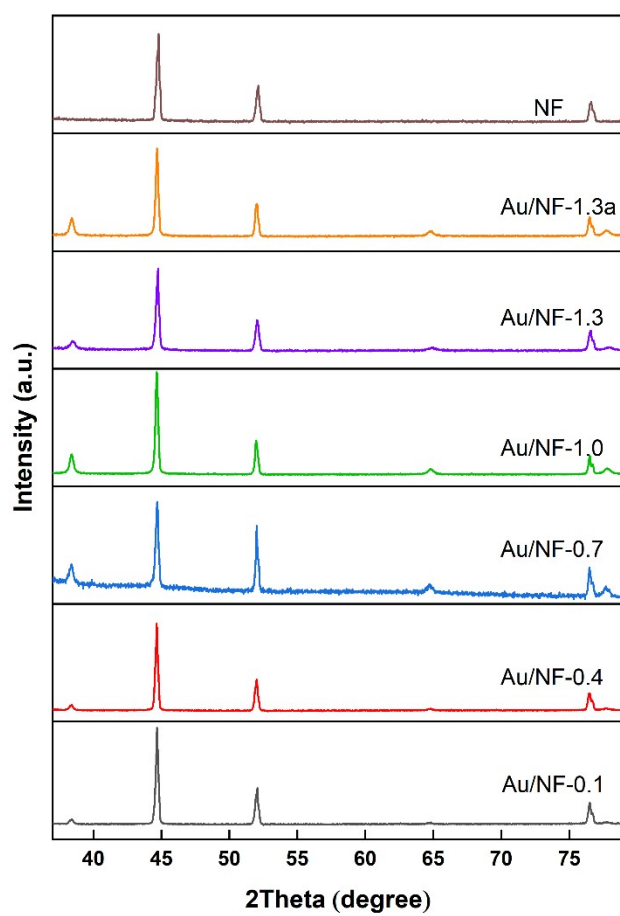

Figure S2. XRD of Au/NF catalyst and nickel foam.

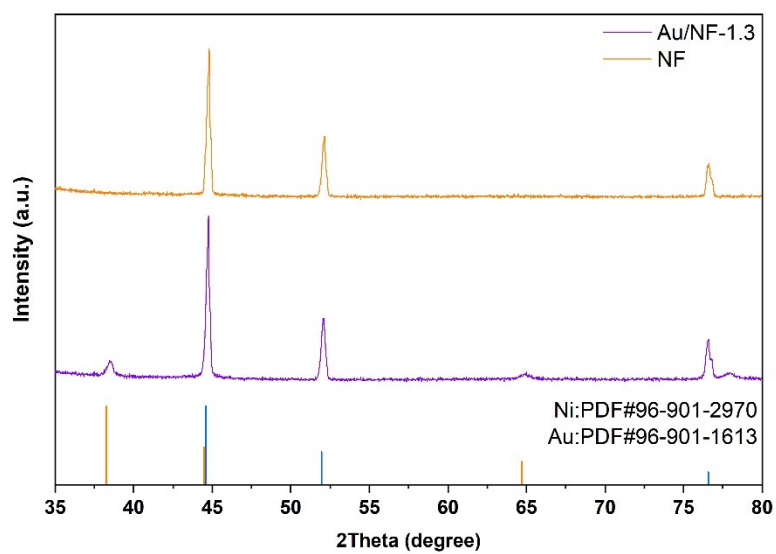

Figure S3. XRD of Au/NF-1.3 and NF catalyst and nickel foam.

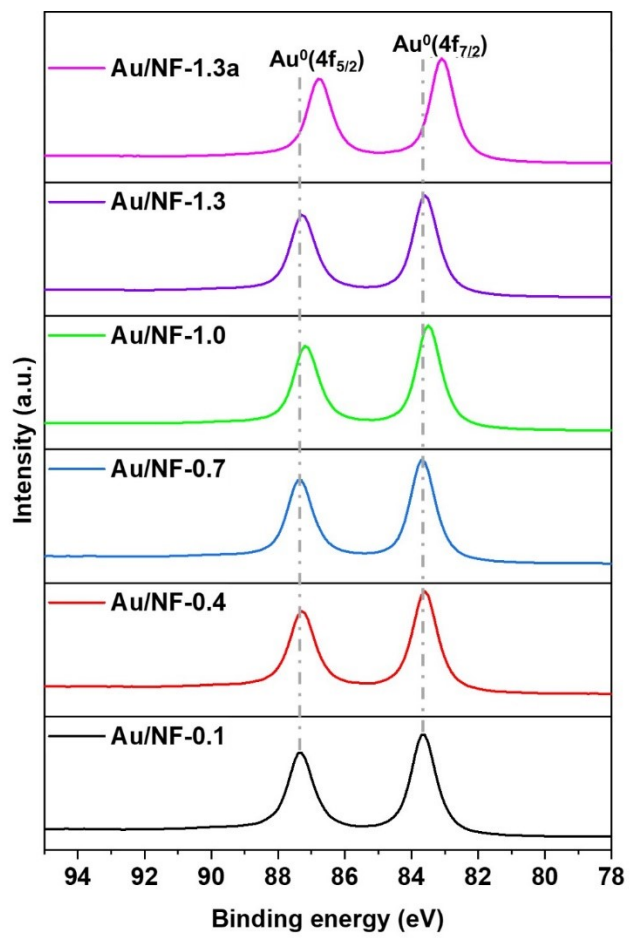

Figure S4. Au 4f XPS spectrum of Au/NF electrodes.

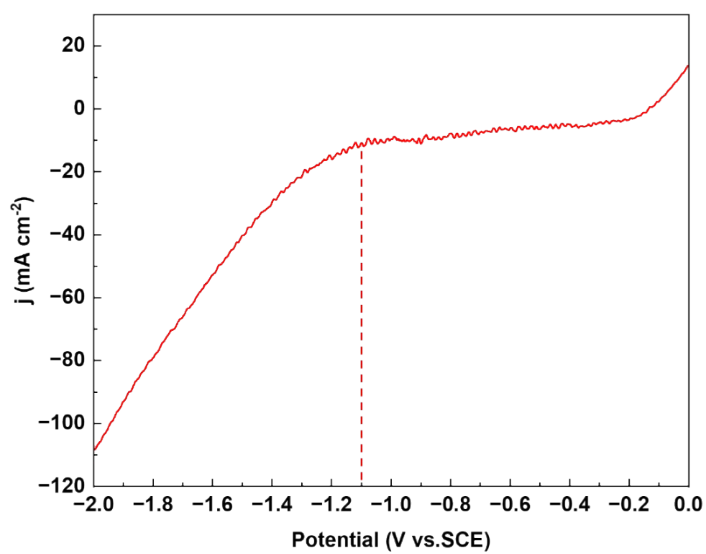

Figure S5. The linear sweep voltammetry (LSV) plot over nickel foam in a 0.5 M  $\text{Na}_2\text{SO}_4$  and 0.5 mM  $\text{HAuCl}_4$  solution with a scan rate of  $20\text{mV s}^{-1}$ .

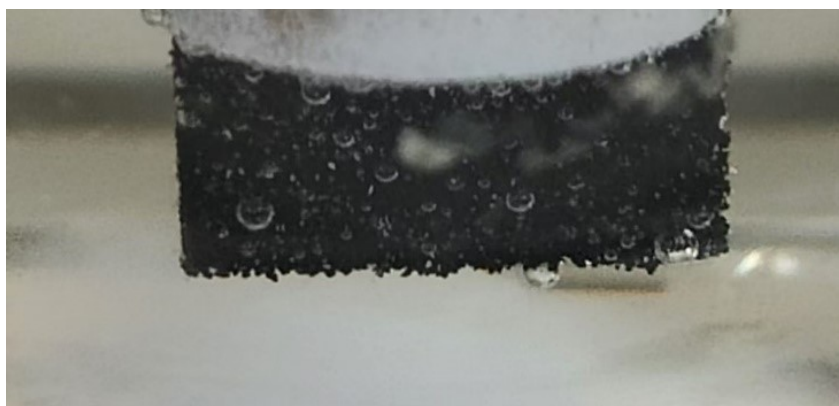

Figure S6. Gas bubbles observed on the surface of the Au/NF-1.3 electrode during the electrodeposition process.

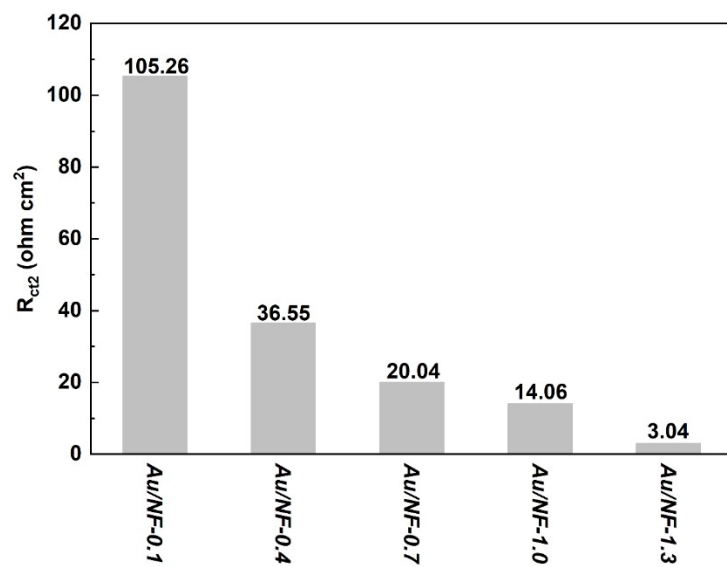

Figure S7.  $R_{ct2}$  of Au/NF electrodes during EOR.



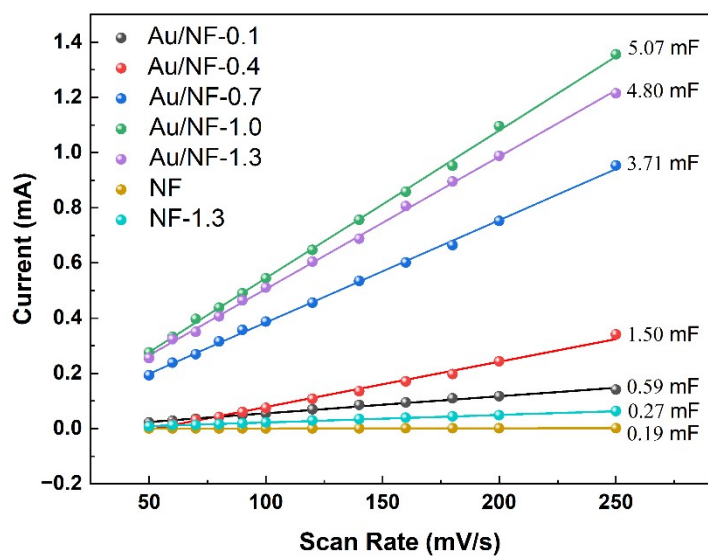

Figure S8. Anodic charging current densities measured at the potential 0.45 V vs. RHE plotted as a function of scan rate. The slope of the linear fit gives the double layer capacitance.

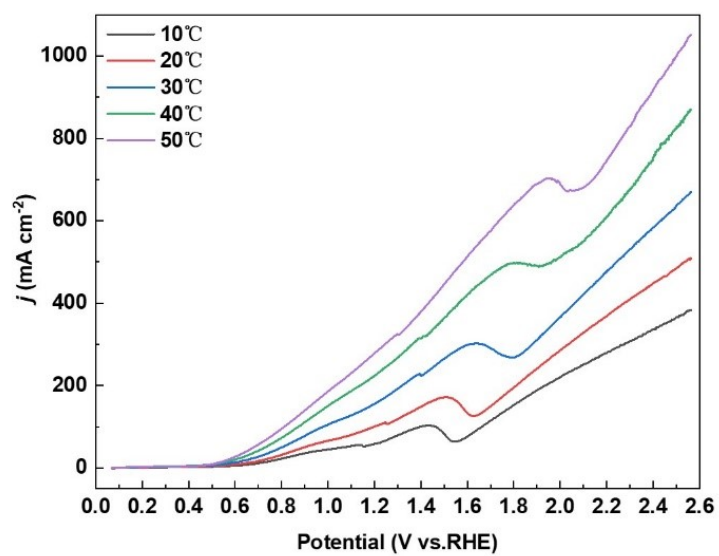

Figure S9. LSV plots ( $50 \text{ mV s}^{-1}$ ) obtained over Au/NF-1.3 electrode at various temperature in 1 M KOH and 1 M ethanol.

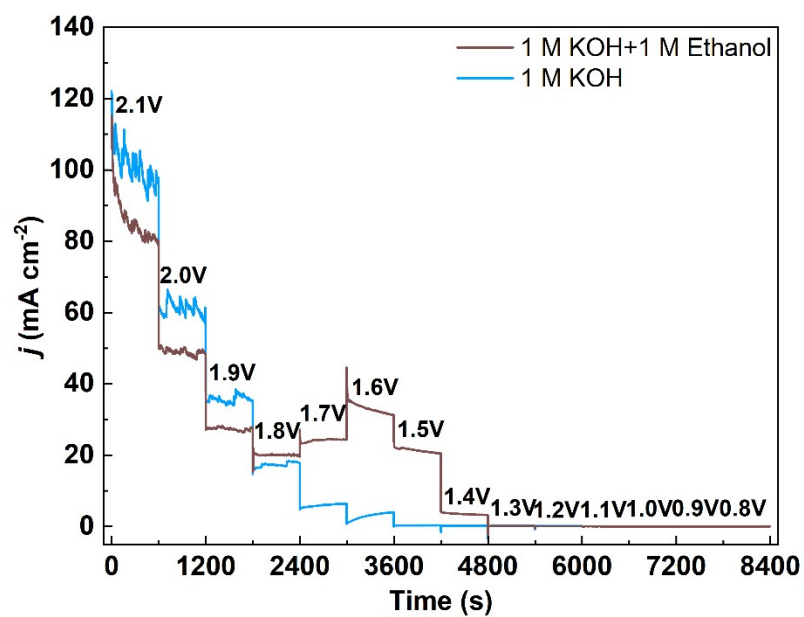

Figure S10. The stepped potential CA plots Au free NF-1.3 in electrolytes with and without ethanol.

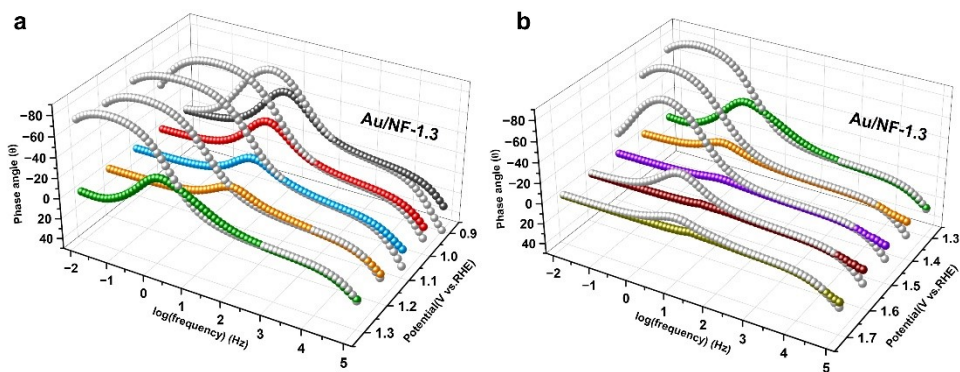

Figure S11. Bode plots of Au/NF-1.3 catalysis over the (c) potential range from 0.9 to 1.3 V and (d) potential range from 1.3 to 1.7 V in 1 M KOH (color dot) with 1 M ethanol or 1 M KOH (gray spot)

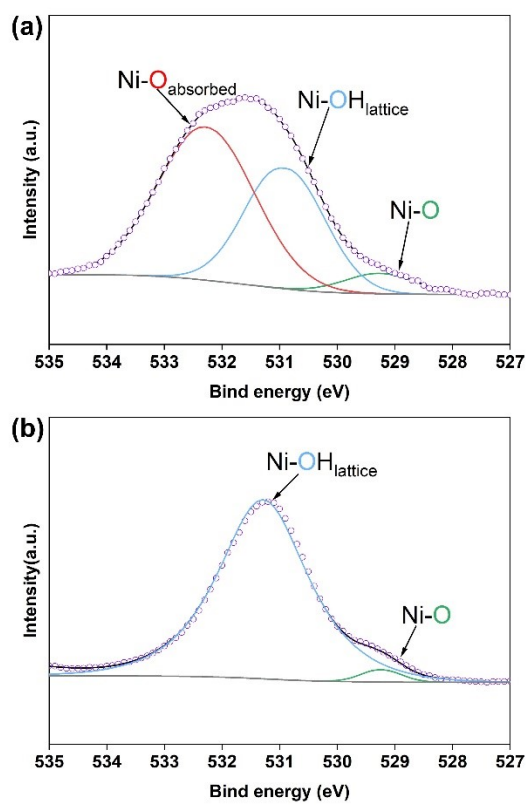

Figure S12. XPS O 1s spectra of (a) Au/NF-1.3 and (b) NF-1.3.

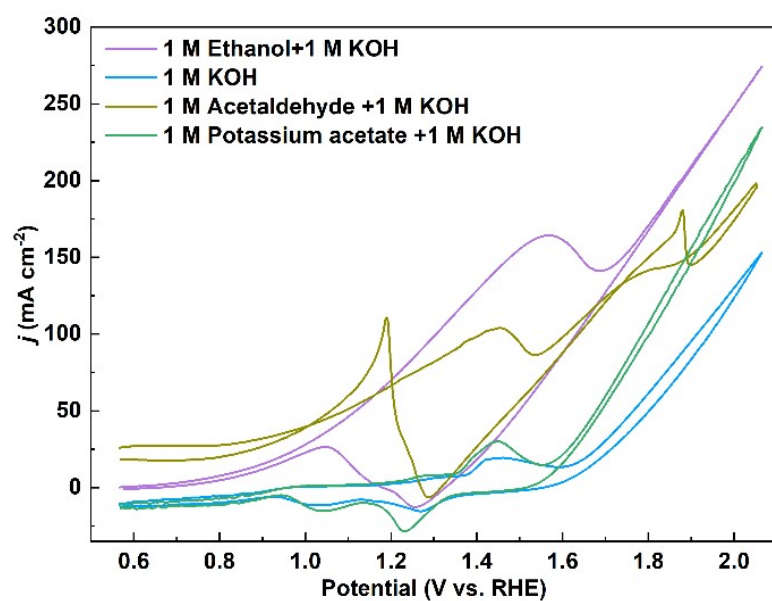

Figure S13. CV curves of Au/NF-1.3 in 1 M KOH, 1 M KOH with 1 M ethanol, 1 M KOH with 1 M acetaldehyde, 1 M KOH with 1 M potassium acetate, scanned at  $50 \text{ mV s}^{-1}$ .

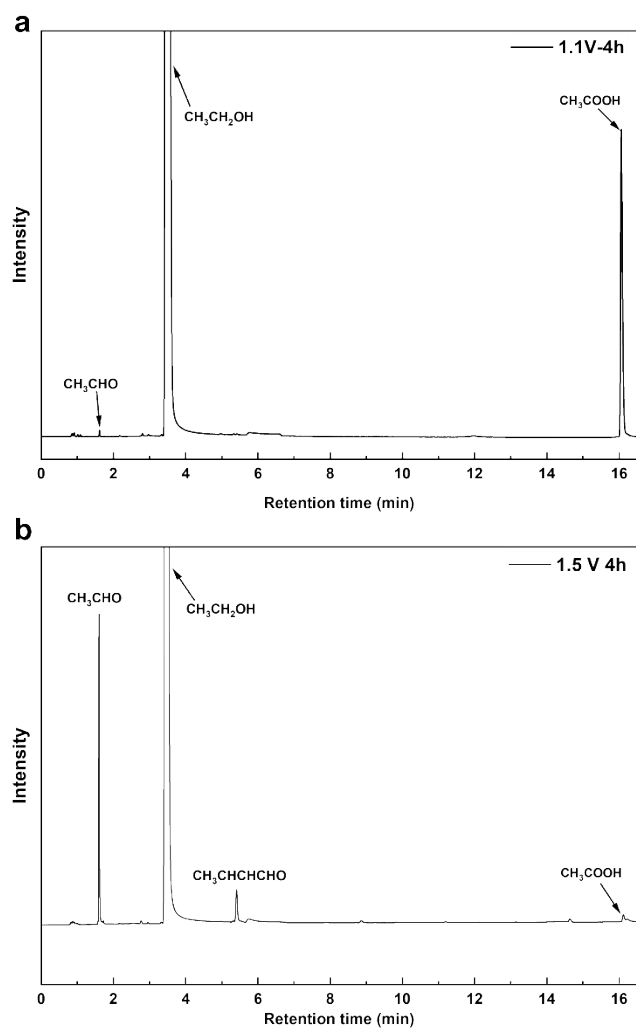

Figure S14. The gas chromatogram of the electrolyte after 4 hours of reaction using the Au/NF-1.3 catalyst in 1 M ethanol and 1 M KOH solutions at (a) 1.1 V vs. RHE and (b) 1.5 V vs. RHE.

Table S1. EOR performance of catalysts in this work in comparison with state-of-the-art catalysts.

| Catalyst                                   | Electrolyte            | Peak potential (V <sub>RHE</sub> ) | Peak current density (mA cm <sup>-2</sup> ) | ECSA (cm <sup>2</sup> )/ (cm <sup>2</sup> g <sup>-1</sup> ) | Ref.      |
|--------------------------------------------|------------------------|------------------------------------|---------------------------------------------|-------------------------------------------------------------|-----------|
| <b>NF</b>                                  | 1 M KOH + 1 M EtOH     | 1.58                               | 29.7                                        | 0.51 / 25.28                                                | This work |
| <b>Au/NF-1.3</b>                           |                        | 1.57                               | 164                                         | 12.44 / 595.21                                              |           |
| <b>NF-1.3</b>                              |                        | 1.68                               | 88.7                                        | 0.70 / 35.49                                                |           |
| <b>Au/NF-0.1</b>                           |                        | 1.27                               | 24.6                                        | 1.54 / 76.62                                                |           |
| <b>Au/NF-0.4</b>                           |                        | 1.31                               | 52.5                                        | 3.89 / 189.76                                               |           |
| <b>Au/NF-0.7</b>                           |                        | 1.36                               | 65.2                                        | 9.66 / 464.42                                               |           |
| <b>Au/NF-1.0</b>                           |                        | 1.42                               | 96.7                                        | 13.13 / 625.24                                              |           |
| <b>Au/MnO<sub>2</sub>/NF</b>               | 0.5 M KOH + 0.5 M EtOH | 1.60                               | 64.0                                        | -                                                           | [1]       |
| <b>NiF/AuNPs</b>                           | 0.5 M NaOH + 1 M EtOH  | 1.21                               | 6.4                                         | -                                                           | [2]       |
| <b>Au@PdAu<sub>1.8L</sub></b>              | 1 M KOH + 1 M EtOH     | 0.91                               | 32.7                                        | -                                                           | [3]       |
| <b>Au@AuPd</b>                             | 0.5 M KOH + 1 M EtOH   | 0.93                               | 24.8                                        | -                                                           | [4]       |
| <b>Au@Pd</b>                               | 1 M NaOH + 1 M EtOH    | 0.84                               | 13.8                                        | -                                                           | [5]       |
| <b>Au-Ag-Pd NWs</b>                        | 1 M KOH + 1 M EtOH     | 0.97                               | 8.6                                         | -                                                           | [6]       |
| <b>Au@FePd</b>                             | 1 M KOH + 1 M EtOH     | 0.96                               | 20.2                                        | -                                                           | [7]       |
| <b>PdAu/C</b>                              | 1 M KOH + 1 M EtOH     | 1.00                               | 84.2                                        | -                                                           | [8]       |
| <b>Ni-W/C</b>                              | 1 M KOH + 1 M EtOH     | 1.60                               | 119.0                                       | -                                                           | [9]       |
| <b>Ni-Co/ErN-GO/GCE</b>                    | 1 M KOH + 1 M EtOH     | 1.75                               | 28.5                                        | -                                                           | [10]      |
| <b>Ni<sub>3</sub>S<sub>4</sub>-NiS-rGO</b> | 1 M KOH + 1 M EtOH     | 1.35                               | 10.0                                        | -                                                           | [11]      |
| <b>Ni/NC</b>                               | 1 M KOH + 1 M EtOH     | 1.17                               | 5.2                                         | -                                                           | [12]      |
| <b>Ni-Co/G</b>                             | 1 M KOH + 1 M EtOH     | 1.25                               | 11.5                                        | -                                                           | [13]      |
| <b>Ni-S NPs</b>                            | 1 M KOH + 1 M EtOH     | 1.60                               | 45.8                                        | -                                                           | [14]      |



Table S2. Fitting results for EIS spectra over Au/NF electrodes at -0.3V vs. SCE.

| <b>Catalyst</b>                                             | <b>Au/NF-0.1</b> | <b>Au/NF-0.4</b> | <b>Au/NF-0.7</b> | <b>Au/NF-1.0</b> | <b>Au/NF-1.3</b> |
|-------------------------------------------------------------|------------------|------------------|------------------|------------------|------------------|
| <b>L<sub>1</sub> (H)</b>                                    | 1.33E-06         | 1.41E-06         | 1.36E-06         | 1.67E-06         | 1.56E-06         |
| <b>R<sub>1</sub> (<math>\Omega</math> cm<sup>2</sup>)</b>   | 13.688           | 10.632           | 12.064           | 12.501           | 12.6633          |
| <b>R<sub>s</sub> (<math>\Omega</math> cm<sup>2</sup>)</b>   | 2.1284           | 2.1417           | 2.1797           | 2.3494           | 2.4103           |
| <b>R<sub>ct1</sub> (<math>\Omega</math> cm<sup>2</sup>)</b> | 6.7934           | 3.7913           | 2.7864           | 0.9836           | 0.19167          |
| <b>CPE<sub>1-T</sub> (F)</b>                                | 0.00203          | 0.00538          | 0.07408          | 0.04445          | 0.00397          |
| <b>CPE<sub>1-P</sub></b>                                    | 0.66359          | 0.56843          | 0.52122          | 0.59381          | 0.94174          |
| <b>R<sub>ct2</sub> (<math>\Omega</math> cm<sup>2</sup>)</b> | 105.26           | 36.548           | 20.043           | 14.057           | 3.0439           |
| <b>CPE<sub>2-T</sub> (F)</b>                                | 9.38E-04         | 0.00221          | 0.00538          | 0.00468          | 0.00749          |
| <b>CPE<sub>2-P</sub></b>                                    | 0.87218          | 0.82627          | 0.9603           | 0.96142          | 0.88414          |

Table S3. Fitting results for EIS spectra over Au/NF-1.3 electrode at various potentials.

| <b>E/V vs. RHE</b>                                          | <b>0.9 V</b> | <b>1.0 V</b> | <b>1.1 V</b> | <b>1.2 V</b> | <b>1.3 V</b> | <b>1.4 V</b> | <b>1.5 V</b> | <b>1.6 V</b> | <b>1.7 V</b> |
|-------------------------------------------------------------|--------------|--------------|--------------|--------------|--------------|--------------|--------------|--------------|--------------|
| <b>L<sub>1</sub> (H)</b>                                    | 1.55E-6      | 1.59E-6      | 1.69E-6      | 1.68E-6      | 1.79E-6      | 1.80E-6      | 1.65E-6      | 1.76E-6      | 1.82E-6      |
| <b>R<sub>1</sub> (<math>\Omega</math> cm<sup>2</sup>)</b>   | 11.690       | 10.655       | 3.254        | 3.369        | 3.706        | 1.466        | 1.145        | 0.793        | 1.962        |
| <b>R<sub>s</sub> (<math>\Omega</math> cm<sup>2</sup>)</b>   | 2.040        | 2.049        | 2.130        | 2.165        | 2.378        | 2.111        | 2.125        | 2.098        | 2.111        |
| <b>R<sub>ct1</sub> (<math>\Omega</math> cm<sup>2</sup>)</b> | 0.719        | 0.644        | 0.422        | 0.203        | 1.200        | 0.452        | 0.257        | 0.203        | 0.181        |
| <b>CPE<sub>1-T</sub> (F)</b>                                | 0.077        | 0.068        | 0.014        | 0.005        | 0.028        | 0.180        | 0.090        | 0.061        | 0.022        |
| <b>CPE<sub>1-P</sub></b>                                    | 0.496        | 0.520        | 0.752        | 0.900        | 0.766        | 0.609        | 0.724        | 0.765        | 0.905        |
| <b>R<sub>ct2</sub> (<math>\Omega</math> cm<sup>2</sup>)</b> | 17.206       | 8.885        | 3.637        | 2.516        | 11.30        | 1.362        | 0.274        | 0.022        | 0.018        |
| <b>CPE<sub>2-T</sub> (F)</b>                                | 0.005        | 0.005        | 0.005        | 0.006        | 0.023        | 0.094        | 0.078        | 0.054        | 0.008        |
| <b>CPE<sub>2-P</sub></b>                                    | 0.946        | 0.961        | 0.967        | 0.937        | 0.964        | 1.006        | 1.085        | 1.675        | 1.571        |
| <b>L<sub>2</sub> (H)</b>                                    | -            | -            | -            | -            | 8.859        | -            | -            | -            | -            |
| <b>R<sub>L</sub> (<math>\Omega</math> cm<sup>2</sup>)</b>   | -            | -            | -            | -            | 2.199        | -            | -            | -            | -            |

Table S4. Fitting results for EIS spectra over NF at various potentials.

| <b>E/V vs. RHE</b>                                          | <b>1.3 V</b> | <b>1.4 V</b> | <b>1.5 V</b> | <b>1.6 V</b> | <b>1.7 V</b> |
|-------------------------------------------------------------|--------------|--------------|--------------|--------------|--------------|
| <b>L<sub>1</sub> (H)</b>                                    | 5.39E-07     | 8.63E-07     | 8.05E-07     | 7.97E-07     | 9.56E-07     |
| <b>R<sub>1</sub> (<math>\Omega</math> cm<sup>2</sup>)</b>   | 2.109        | 3.125        | 3.182        | 2.998        | 2.438        |
| <b>R<sub>s</sub> (<math>\Omega</math> cm<sup>2</sup>)</b>   | 1.010        | 1.030        | 1.176        | 1.007        | 1.036        |
| <b>R<sub>ct1</sub> (<math>\Omega</math> cm<sup>2</sup>)</b> | 1.419        | 0.960        | 0.817        | 0.757        | 0.679        |
| <b>CPE<sub>1-T</sub> (F)</b>                                | 1.57E-04     | 8.73E-04     | 8.18E-04     | 8.34E-04     | 6.97E-04     |
| <b>CPE<sub>1-P</sub></b>                                    | 0.812        | 0.889        | 1.302        | 0.890        | 0.892        |
| <b>R<sub>ct2</sub> (<math>\Omega</math> cm<sup>2</sup>)</b> | 28.119       | 24.812       | 21.741       | 12.360       | 4.409        |
| <b>CPE<sub>2-T</sub> (F)</b>                                | 1.95E-03     | 1.91E-03     | 4.26E-03     | 5.72E-03     | 8.72E-04     |
| <b>CPE<sub>2-P</sub></b>                                    | 0.875        | 0.851        | 0.747        | 0.873        | 0.877        |

## Reference

- [1] L. Bigiani, T. Andreu, C. Maccato, E. Fois, A. Gasparotto, C. Sada, G. Tabacchi, D. Krishnan, J. Verbeeck, J. R. Morante and D. Barreca, *J. Mater. Chem. A*, **2020**, *8*, 16902-16907.
- [2] A. Hatamie, E. Rezvani, A. S. Rasouli and A. Simchi, *Electroanalysis*, **2018**, *31*, 504-511.
- [3] X. Wang, H. Yang, M. Liu, Z. Liu, K. Liu, Z. Mu, Y. Zhang, T. Cheng and C. Gao, *ACS Nano*, **2024**, *18*, 18701-18711.
- [4] M. Zhang, X. Zhang, M. Lv, X. Yue, Z. Zheng and H. Xia, *Small*, **2023**, *19*, 2205781-2205793.
- [5] X. Zhou, Y. Ma, Y. Ge, S. Zhu, Y. Cui, B. Chen, L. Liao, Q. Yun, Z. He, H. Long, L. Li, B. Huang, Q. Luo, L. Zhai, X. Wang, L. Bai, G. Wang, Z. Guan, Y. Chen, C. S. Lee, J. Wang, C. Ling, M. Shao, Z. Fan and H. Zhang, *J. Am. Chem. Soc.*, **2022**, *144*, 547-555.
- [6] S. Zhang, K. Liu, Z. Liu, M. Liu, Z. Zhang, Z. Qiao, L. Ming and C. Gao, *Nano Lett.*, **2021**, *21*, 1074-1082.
- [7] D. Liu, Q. Zeng, H. Liu, C. Hu, D. Chen, L. Xu and J. Yang, *Cell Rep. Phys. Sci.*, **2021**, *2*, 100357-100372.
- [8] W. Zhou, M. Li, L. Zhang and S. H. Chan, *Electrochim. Acta*, **2014**, *123*, 233-239.
- [9] A. Zaher, W. M. A. El Rouby and N. A. M. Barakat, *Fuel*, **2020**, *280*, 118654-118663.
- [10] K. Rahmani and B. Habibi, *RSC Adv.*, **2019**, *9*, 34050-34064.
- [11] S. Azizi, M. B. Askari, M. T. T. Moghadam, M. Seifi and A. Di Bartolomeo, *Nano Futures*, **2023**, *7*, 015002-015015.
- [12] W. Shi, Q. Wang, F. Qin, J. Yu, M. Jia, H. Gao, Y. Zhang, Y. Zhao and G. Li, *Electrochim. Acta*, **2017**, *232*, 332-338.
- [13] Z. Wang, Y. Du, F. Zhang, Z. Zheng, Y. Zhang and C. Wang, *J. Solid State Electrochem.*, **2012**, *17*, 99-107.
- [14] J. Li, X. Tian, X. Wang, T. Zhang, M. C. Spadaro, J. Arbiol, L. Li, Y. Zuo and A. Cabot, *Inorg. Chem.*, **2022**, *61*, 13433-13441.
